# Supplementary material for: Voltage-control of the in-plane magnetic anisotropy in hybrid magnetoelectric Ni90Fe10/BaTiO3(011) heterostructures
Source: Royal Society of Chemistry journal article supplement (doi:10.1039/d4tc04614e), 2025-01-01
Supplement: d4tc04614e1.pdf [file d4tc04614e1.pdf]

## Supplementary information

### 1) X-ray diffraction results

Fig. Supp. 1 shows the  $\theta - 2\theta$  measurement of the heterostructure. The spectrum reveals BTO(011) reflections, along with Au and NiFe peaks, while the Ti layer is not detected. Cu reflections are from the sample holder.

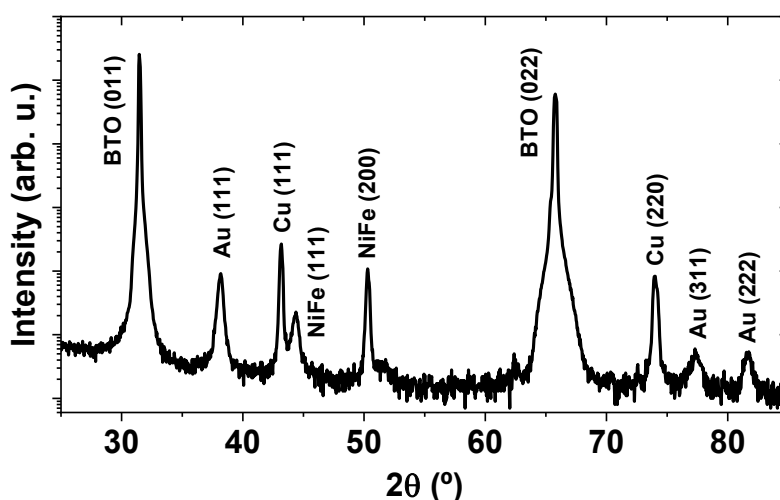

**Supplementary Figure 1.**  $\theta$ - $2\theta$  measurement of the heterostructure.

To determine the lattice parameters  $a$  and  $c$  of the tetragonal cell of BTO, we performed reciprocal space mapping (RSM). Two reflections were used: (011) and (122). The experimental results are diffractograms obtained after centering around the  $\omega$  axis. Supplementary Figure 2 shows the results obtained. We fitted the main peak using a Gaussian fit to calculate the values of  $a$  and  $c$  by employing the following equations:

$$a = \sqrt{\frac{(h_1^2 + k_1^2)l_2^2 - (h_2^2 + k_2^2)l_1^2}{d_2^2l_2^2 - d_1^2l_1^2}}d_1d_2 \quad (1)$$

$$c = \sqrt{\frac{(h_1^2 + k_1^2)l_2^2 - (h_2^2 + k_2^2)l_1^2}{(h_1^2 + k_1^2)d_1^2 - (h_2^2 + k_2^2)d_2^2}}d_1d_2 \quad (2)$$

Where  $h_n, k_n, l_n$  are the indexes of the first reflection  $n = 1$ , and the second reflection  $n = 2$ , respectively,  $d_n$  is the interplanar distance for each reflection, which can be calculated from  $d = \lambda / (2 \sin \theta)$ ,  $\lambda$  the x-rays wavelength and  $\theta$  the angle obtained from the  $2\theta - \omega$  scan. The obtained lattice constants are  $a = 3.994$  and  $c = 4.034$ .

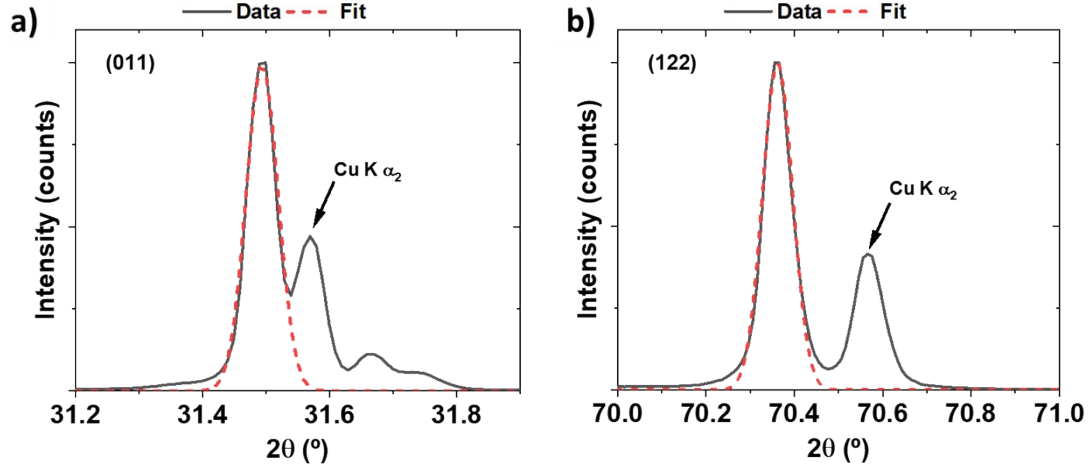

**Supplementary Figure 2.** Diffractograms obtained from RSM. Filled lines are the experimental data, and dashed lines are the Gaussian fit. (a) RSM for the (011) reflection and (b) for the (122) reflection.
